# Supplementary material
Source: MDPI journal article supplement (https://www.mdpi.com/2076-3417/11/19/9325)
Supplement: s1 [file s1]

## Supplementary materials

**Table S1.** Summary of macroscopic findings of acute oral toxicity.

| Dosage group (mg/kg) |                  |                     | 0 | 500 | 1000 | 2000 |
|----------------------|------------------|---------------------|---|-----|------|------|
| <b>Male</b>          | Abnormal lesions | Number examined     | 5 | 5   | 5    | 5    |
|                      |                  | Number unremarkable | 5 | 5   | 5    | 5    |
|                      | Abdominal cavity | Number examined     | 5 | 5   | 5    | 5    |
|                      |                  | Number unremarkable | 5 | 5   | 5    | 5    |
|                      | Thoracic cavity  | Number examined     | 5 | 5   | 5    | 5    |
|                      |                  | Number unremarkable | 5 | 5   | 5    | 5    |
| <b>Female</b>        | Abnormal lesions | Number examined     | 5 | 5   | 5    | 5    |
|                      |                  | Number unremarkable | 5 | 5   | 5    | 5    |
|                      | Abdominal cavity | Number examined     | 5 | 5   | 5    | 5    |
|                      |                  | Number unremarkable | 5 | 5   | 5    | 5    |
|                      | Thoracic cavity  | Number examined     | 5 | 5   | 5    | 5    |
|                      |                  | Number unremarkable | 5 | 5   | 5    | 5    |

**Table S2.** The numbers of mortality of acute oral toxicity.

| Dosage group (mg/kg) |      | Treatment phase |         |         |          | Final Mortality * |
|----------------------|------|-----------------|---------|---------|----------|-------------------|
|                      |      | ≤1 day          | ≤3 days | ≤7 days | ≤15 days |                   |
| <b>Male</b>          | 0    | 0               | 0       | 0       | 0        | 0/5               |
|                      | 500  | 0               | 0       | 0       | 0        | 0/5               |
|                      | 1000 | 0               | 0       | 0       | 0        | 0/5               |
|                      | 2000 | 0               | 0       | 0       | 0        | 0/5               |
| <b>Female</b>        | 0    | 0               | 0       | 0       | 0        | 0/5               |
|                      | 500  | 0               | 0       | 0       | 0        | 0/5               |
|                      | 1000 | 0               | 0       | 0       | 0        | 0/5               |
|                      | 2000 | 0               | 0       | 0       | 0        | 0/5               |

\* Number of animals with dead animals / Total animal number

**Table S3.** The numbers of mortality of chronic oral toxicity.

| Dosage group (mg·kg <sup>-1</sup> ·d <sup>-1</sup> ) |      | Treatment phase |         |         |          | Final Mortality * |
|------------------------------------------------------|------|-----------------|---------|---------|----------|-------------------|
|                                                      |      | ≤1 week         | ≤4 week | ≤8 week | ≤13 week |                   |
| <b>Male</b>                                          | 0    | 0               | 0       | 0       | 0        | 0/10              |
|                                                      | 500  | 0               | 0       | 0       | 0        | 0/10              |
|                                                      | 1000 | 0               | 0       | 0       | 0        | 0/10              |
|                                                      | 2000 | 0               | 0       | 0       | 0        | 0/10              |
| <b>Female</b>                                        | 0    | 0               | 0       | 0       | 0        | 0/10              |
|                                                      | 500  | 0               | 0       | 0       | 0        | 0/10              |
|                                                      | 1000 | 0               | 0       | 0       | 0        | 0/10              |
|                                                      | 2000 | 0               | 0       | 0       | 0        | 0/10              |

\* Number of animals with dead animals / Total animal number

**Table S4.** Effects of chronic oral administration of Yeosinsan extract in relative organ weight (percent of body weight).

| Dosage group (mg·kg <sup>-1</sup> ·d <sup>-1</sup> ) |                                                | 0                | 500              | 1000             | 2000               |
|------------------------------------------------------|------------------------------------------------|------------------|------------------|------------------|--------------------|
| Male                                                 | TBW (g)                                        | 546.1 ± 79.76    | 543.6 ± 42.11    | 551.0 ± 49.88    | 565.0 ± 42.3       |
|                                                      | (ADRG) Adrenal glands                          | 0.0114 ± 0.00084 | 0.0117 ± 0.00139 | 0.0118 ± 0.00193 | 0.0114 ± 0.00116   |
|                                                      | (BRA) Brain                                    | 0.4009 ± 0.03915 | 0.4100 ± 0.04120 | 0.3971 ± 0.03391 | 0.3935 ± 0.02886   |
|                                                      | (HT) Heart                                     | 0.3132 ± 0.01592 | 0.2920 ± 0.01696 | 0.2986 ± 0.01851 | 0.2978 ± 0.01721   |
|                                                      | (KID) Kidneys                                  | 0.6697 ± 0.06812 | 0.7311 ± 0.07892 | 0.7378 ± 0.05424 | 0.7574 ± 0.04892 * |
|                                                      | (LIV) Liver                                    | 2.8097 ± 0.29011 | 2.9097 ± 0.23430 | 2.8389 ± 0.16781 | 2.9352 ± 0.12050   |
|                                                      | (PITG) Pituitary glands                        | 0.0026 ± 0.00034 | 0.0027 ± 0.00047 | 0.0025 ± 0.00043 | 0.0023 ± 0.00033   |
|                                                      | (SPL) Spleen                                   | 0.1672 ± 0.02193 | 0.1660 ± 0.01391 | 0.1673 ± 0.01904 | 0.1881 ± 0.03440   |
|                                                      | (TES) Testes                                   | 0.6530 ± 0.09203 | 0.6483 ± 0.05873 | 0.6410 ± 0.05069 | 0.5896 ± 0.12706   |
|                                                      | (THY) Thymus                                   | 0.0878 ± 0.01699 | 0.0815 ± 0.01821 | 0.0814 ± 0.01121 | 0.0811 ± 0.01831   |
|                                                      | (EPI) Epididymis                               | 0.2974 ± 0.03916 | 0.2972 ± 0.02440 | 0.2775 ± 0.02408 | 0.2578 ± 0.03942 * |
|                                                      | (LUN) Lung                                     | 0.3179 ± 0.03295 | 0.3272 ± 0.02489 | 0.3136 ± 0.03368 | 0.3258 ± 0.01546   |
|                                                      | (THPA) Thyroid and parathyroid glands          | 0.0045 ± 0.00111 | 0.0051 ± 0.00110 | 0.0042 ± 0.00050 | 0.0044 ± 0.00080   |
|                                                      | (SVCG) Seminal vesicles with coagulating gland | 0.3658 ± 0.07572 | 0.3451 ± 0.06769 | 0.3309 ± 0.06510 | 0.3037 ± 0.06724   |
|                                                      | (PROS) Prostate                                | 0.1130 ± 0.02919 | 0.1129 ± 0.02694 | 0.1054 ± 0.02930 | 0.0114 ± 0.03132   |
| Fe-male                                              | TBW (g)                                        | 309.4 ± 26.33    | 300.5 ± 20.04    | 292.2 ± 19.22    | 290.4 ± 29.27      |
|                                                      | (ADRG) Adrenal glands                          | 0.0262 ± 0.00225 | 0.0274 ± 0.00481 | 0.0268 ± 0.00285 | 0.0268 ± 0.00589   |
|                                                      | (BRA) Brain                                    | 0.6489 ± 0.04490 | 0.6745 ± 0.05233 | 0.6831 ± 0.05653 | 0.6836 ± 0.06319   |
|                                                      | (HT) Heart                                     | 0.3384 ± 0.02245 | 0.3517 ± 0.03004 | 0.3337 ± 0.02633 | 0.3336 ± 0.03162   |
|                                                      | (KID) Kidneys                                  | 0.7515 ± 0.05716 | 0.7694 ± 0.08297 | 0.7714 ± 0.06758 | 0.7933 ± 0.08546   |
|                                                      | (LIV) Liver                                    | 2.8163 ± 0.18902 | 2.8114 ± 0.20877 | 2.8737 ± 0.18429 | 2.9696 ± 0.20901   |
|                                                      | (OVA) Ovaries                                  | 0.0317 ± 0.00769 | 0.0315 ± 0.00434 | 0.0286 ± 0.00420 | 0.0319 ± 0.00620   |
|                                                      |                                                |                  |                  |                  |                    |
|                                                      |                                                |                  |                  |                  |                    |
|                                                      |                                                |                  |                  |                  |                    |

|                                       |          |          |            |            |
|---------------------------------------|----------|----------|------------|------------|
| (PITG) Pituitary glands               | 0.0069 ± | 0.0059 ± | 0.0066 ±   | 0.0068 ±   |
|                                       | 0.00120  | 0.00113  | 0.00120    | 0.00115    |
| (SPL) Spleen                          | 0.1870 ± | 0.2032 ± | 0.2243 ±   | 0.2279 ±   |
|                                       | 0.02320  | 0.03088  | 0.01930 ** | 0.03152 ** |
| (THY) Thymus                          | 0.1112 ± | 0.1092 ± | 0.1132 ±   | 0.1178 ±   |
|                                       | 0.01727  | 0.01902  | 0.01450    | 0.02298    |
| (SALG) Salivary glands                | 0.1508 ± | 0.1530 ± | 0.1541 ±   | 0.1630 ±   |
|                                       | 0.01884  | 0.01766  | 0.01553    | 0.01447    |
| (LUN) Lung                            | 0.4375 ± | 0.4504 ± | 0.4554 ±   | 0.4640 ±   |
|                                       | 0.05100  | 0.04816  | 0.02285    | 0.03459    |
| (THPA) Thyroid and parathyroid glands | 0.0061 ± | 0.0067 ± | 0.0064 ±   | 0.0064 ±   |
|                                       | 0.00104  | 0.00124  | 0.00105    | 0.00099    |
| (UTEC) Uterus/cervix                  | 0.2371 ± | 0.3017 ± | 0.2826 ±   | 0.2587 ±   |
|                                       | 0.06294  | 0.15211  | 0.11341    | 0.12401    |

Data were expressed as Mean ± SD, n = 10 animals per group. \* P<0.05, \*\* P<0.01 according to Dunnett's LSD test.

**Table S5.** Summary of ophthalmology of chronic oral toxicity.

| Dosage group (mg·kg <sup>-1</sup> ·d <sup>-1</sup> ) |                           |                                                  | 0  | 500 | 1000 | 2000 |
|------------------------------------------------------|---------------------------|--------------------------------------------------|----|-----|------|------|
| <b>Male</b>                                          | No abnormalities detected | Number of animals examined                       | 10 | 10  | 10   | 10   |
|                                                      |                           | Number of animals not affected                   | 10 | 10  | 10   | 10   |
|                                                      |                           | Mean number of animal days with no clinical sign | 1  | 1   | 1    | 1    |
| <b>Fe-male</b>                                       | No abnormalities detected | Number of animals examined                       | 10 | 10  | 10   | 10   |
|                                                      |                           | Number of animals not affected                   | 10 | 10  | 10   | 10   |
|                                                      |                           | Mean number of animal days with no clinical sign | 1  | 1   | 1    | 1    |

**Table S6.** Effects of chronic oral administration of Yeosinsan extract in urinalysis.

| Dosage group (mg·kg <sup>-1</sup> ·d <sup>-1</sup> ) |              | 0               | 500              | 1000            | 2000           |
|------------------------------------------------------|--------------|-----------------|------------------|-----------------|----------------|
| <b>Male</b>                                          | VOL (mL)     | 21.2 ± 7.90     | 15.6 ± 4.40      | 19.2 ± 8.95     | 27.0 ± 10.76   |
|                                                      | SG           | 1.011 ± 0.0032  | 1.013 ± 0.0026   | 1.011 ± 0.0044  | 1.012 ± 0.0041 |
|                                                      | pH           | 7.0 ± 0.00      | 6.9 ± 0.21       | 6.9 ± 0.21      | 6.9 ± 0.24     |
|                                                      | U-K (mmol/L) | 100.21 ± 32.227 | 118.26 ± 29.950  | 94.99 ± 28.221  | 93.26 ± 38.497 |
|                                                      | U-Cl         | 33.9 ± 10.52    | 34.6 ± 9.41      | 32.3 ± 6.55     | 32.0 ± 11.33   |
|                                                      | U-Na         | 33.9 ± 16.24    | 28.1 ± 9.33      | 30.1 ± 10.02    | 29.4 ± 17.37   |
|                                                      |              |                 |                  |                 |                |
| <b>Female</b>                                        | VOL (mL)     | 12.6 ± 4.33     | 14.1 ± 5.55      | 12.4 ± 3.37     | 16.0 ± 8.00    |
|                                                      | SG           | 1.015 ± 0.0033  | 1.015 ± 0.0064   | 1.016 ± 0.0037  | 1.014 ± 0.0041 |
|                                                      | pH           | 6.7 ± 0.35      | 6.8 ± 0.63       | 6.6 ± 0.28      | 6.8 ± 0.26     |
|                                                      | U-K (mmol/L) | 106.69 ± 25.914 | 135.38 ± 119.796 | 104.33 ± 25.166 | 85.27 ± 40.315 |
|                                                      | U-Cl         | 43.4 ± 10.07    | 66.4 ± 66.58     | 44.7 ± 12.73    | 36.1 ± 13.89   |
|                                                      | U-Na         | 42.2 ± 14.84    | 64.8 ± 60.47     | 41.2 ± 21.93    | 27.0 ± 13.88   |
|                                                      |              |                 |                  |                 |                |

Data were expressed as Mean ± SD, n = 10 animals per group.
